# Supplementary material
Source: MDPI journal article supplement (https://www.mdpi.com/2073-4344/11/12/1540)
Supplement: s1 [file s1]

# Enhancing Methane Conversion by Modification of Zn States in Co-Reaction of MTA

## Contents

**Figure S1.** SEM images of HZSM-5, 1.0Zn/Z, 2.0Zn/Z, 3.0Zn/Z, 1.0Zn/Z-IE, 1.0Zn/Z-PM, 1.0Zn/Z-H<sub>2</sub> and 1.0Zn/Z-N<sub>2</sub>.

**Figure S2.** EDS images of HZSM-5, 1.0Zn/Z, 3.0Zn/Z, 1.0Zn/Z-IE and 1.0Zn/Z-PM.

**Figure S3.** NH<sub>3</sub>-TPD curves of HZSM-5, 1.0Zn/Z, 2.0Zn/Z and 3.0Zn/Z.

**Figure S4.** Product distribution of MTA and co-reactions on HZSM-5, 1.0Zn/Z, 2.0Zn/Z and 3.0Zn/Z.

**Figure S5.** XRD patterns in range of 5-50° of HZSM-5, 1.0Zn/Z, 2.0Zn/Z and 3.0Zn/Z and MFI simulated one.

**Figure S6.** NH<sub>3</sub>-TPD curves of HZSM-5, 1.0Zn/Z, 1.0Zn/Z-IE and 1.0Zn/Z-PM.

**Figure S7.** Product distribution of MTA and co-reactions on HZSM-5, 1.0Zn/Z, 1.0Zn/Z-IE and 1.0Zn/Z-PM.

**Figure S8.** Aromatics selectivity of co-reaction over HZSM-5, 1.0Zn/Z, 1.0Zn/Z-IE and 1.0Zn/Z-PM by different Zn-loading strategies with time on stream.

**Figure S9.** XRD patterns in range of 5-50° of HZSM-5, 1.0Zn/Z, 1.0Zn/Z-H<sub>2</sub> and 1.0Zn/Z-N<sub>2</sub> and MFI simulated one.

**Figure S10.** Product distribution of MTA and co-reactions on HZSM-5, 1.0Zn/Z, 1.0Zn/Z-H<sub>2</sub> and 1.0Zn/Z-N<sub>2</sub>.

**Figure S11.** Difference of product distribution between co-reaction and MTA reaction over HZSM-5, 1.0Zn/Z, 1.0Zn/Z-H<sub>2</sub> and 1.0Zn/Z-N<sub>2</sub>.

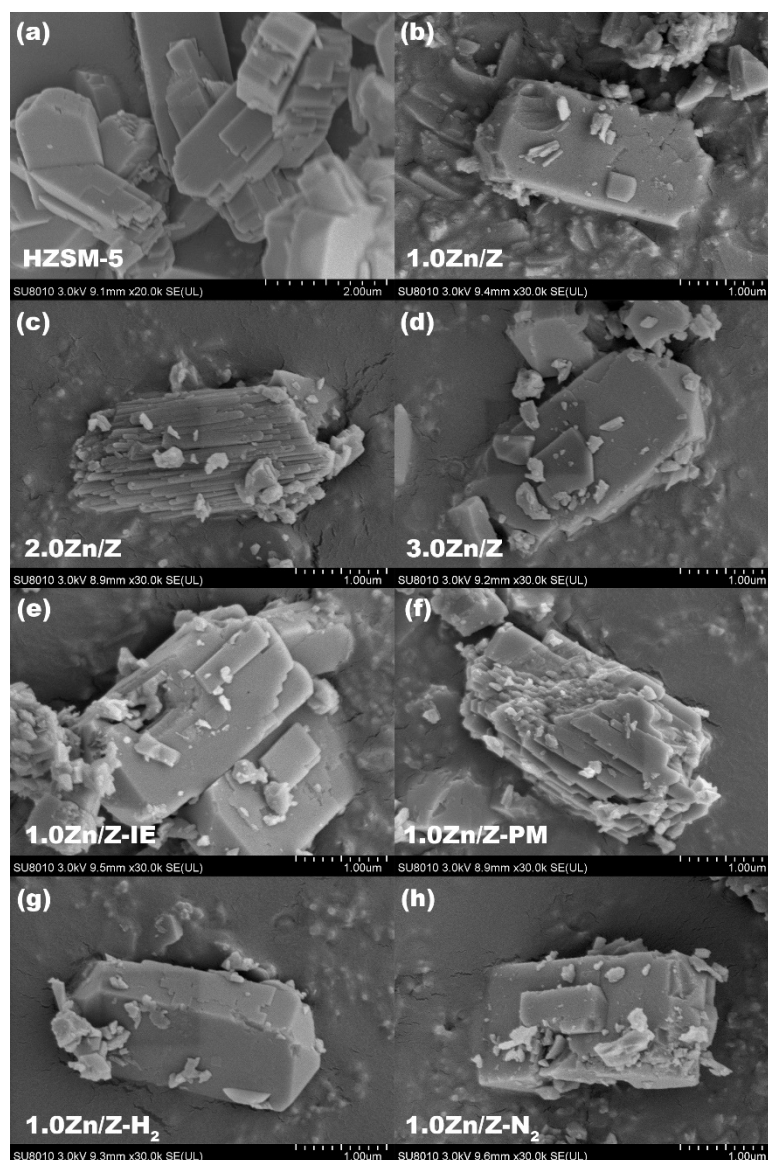

**Figure S1.** SEM images of HZSM-5, 1.0Zn/Z, 2.0Zn/Z, 3.0Zn/Z, 1.0Zn/Z-IE, 1.0Zn/Z-PM, 1.0Zn/Z-H<sub>2</sub> and 1.0Zn/Z-N<sub>2</sub>.

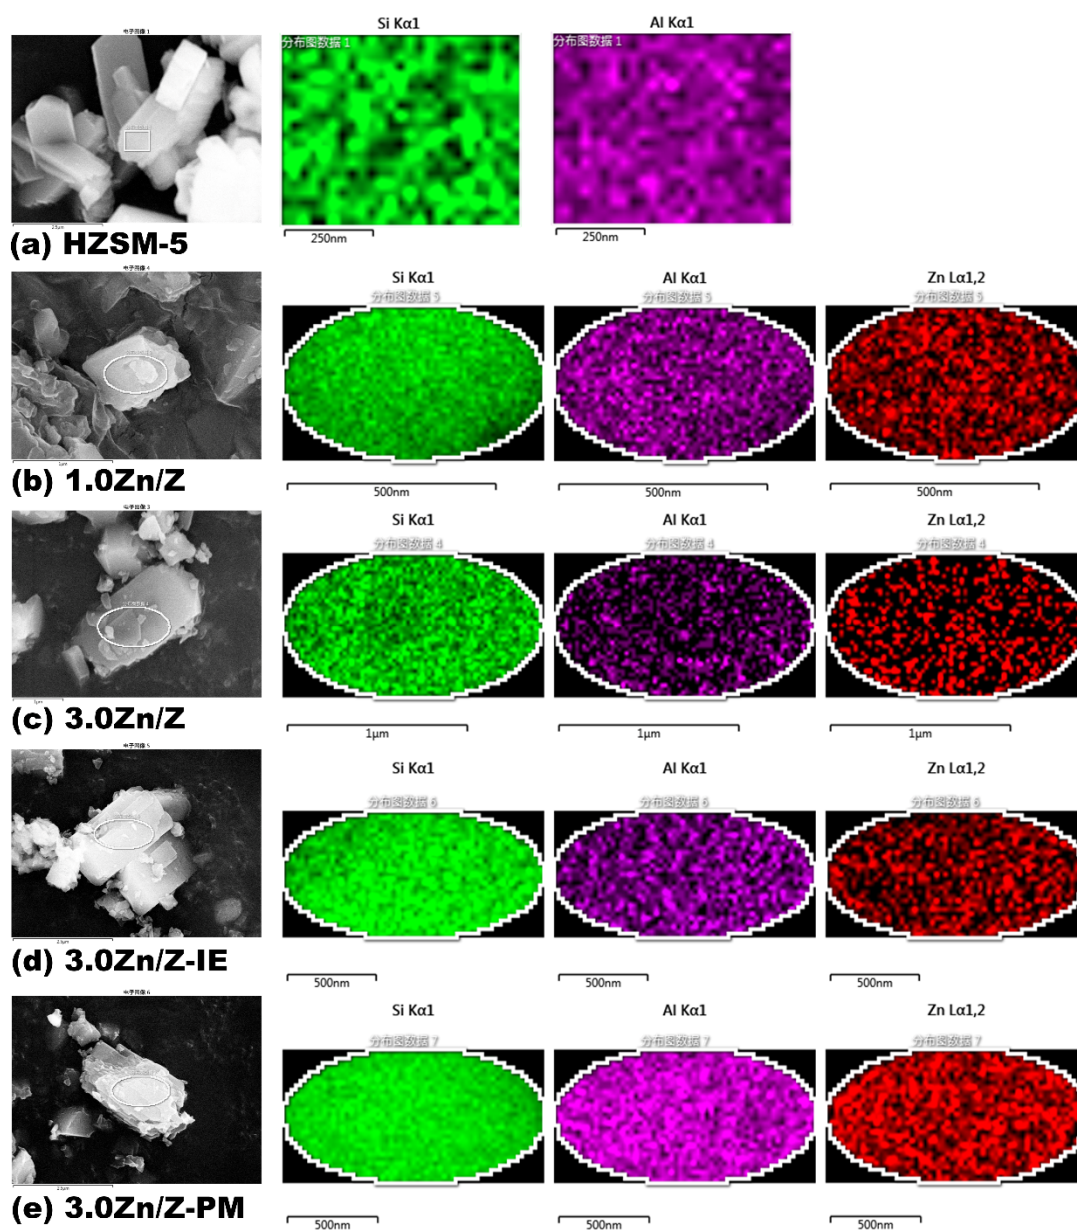

Figure S2. EDS images of HZSM-5, 1.0Zn/Z, 3.0Zn/Z, 1.0Zn/Z-IE and 1.0Zn/Z-PM.

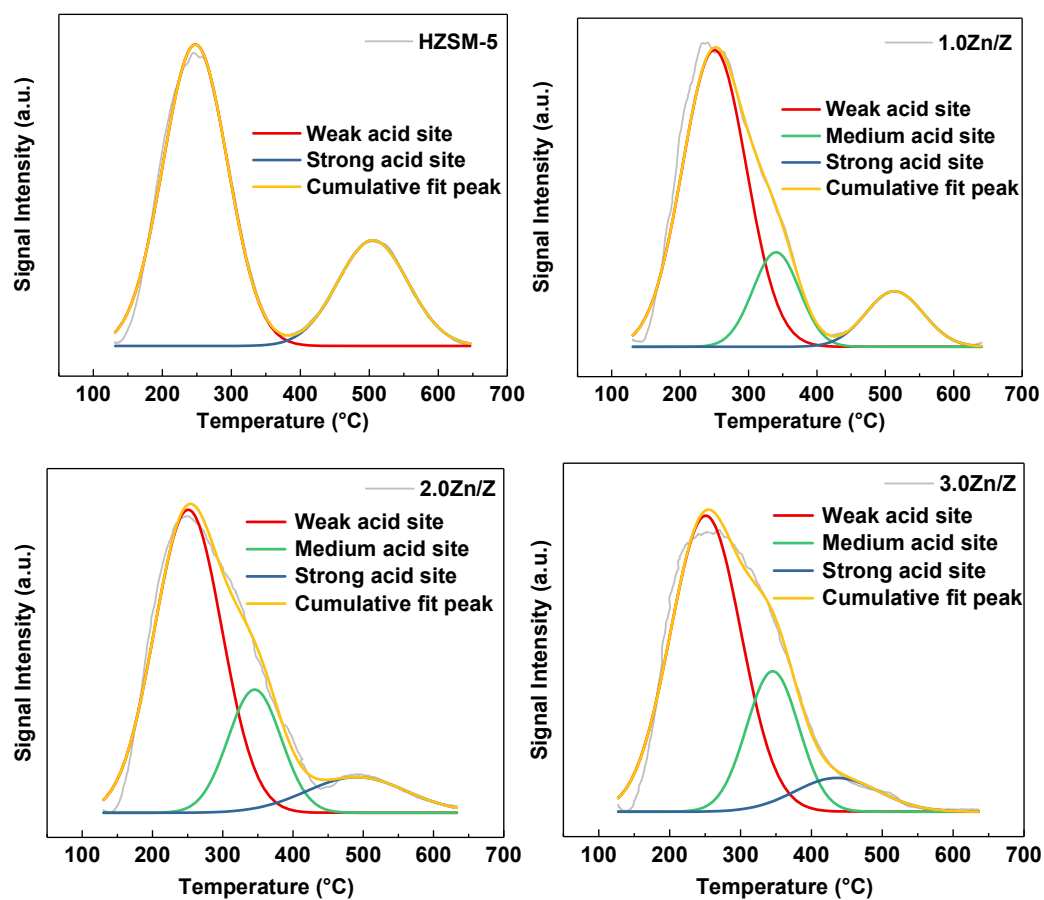

**Figure S3.**  $\text{NH}_3$ -TPD curves of HZSM-5, 1.0Zn/Z, 2.0Zn/Z and 3.0Zn/Z.

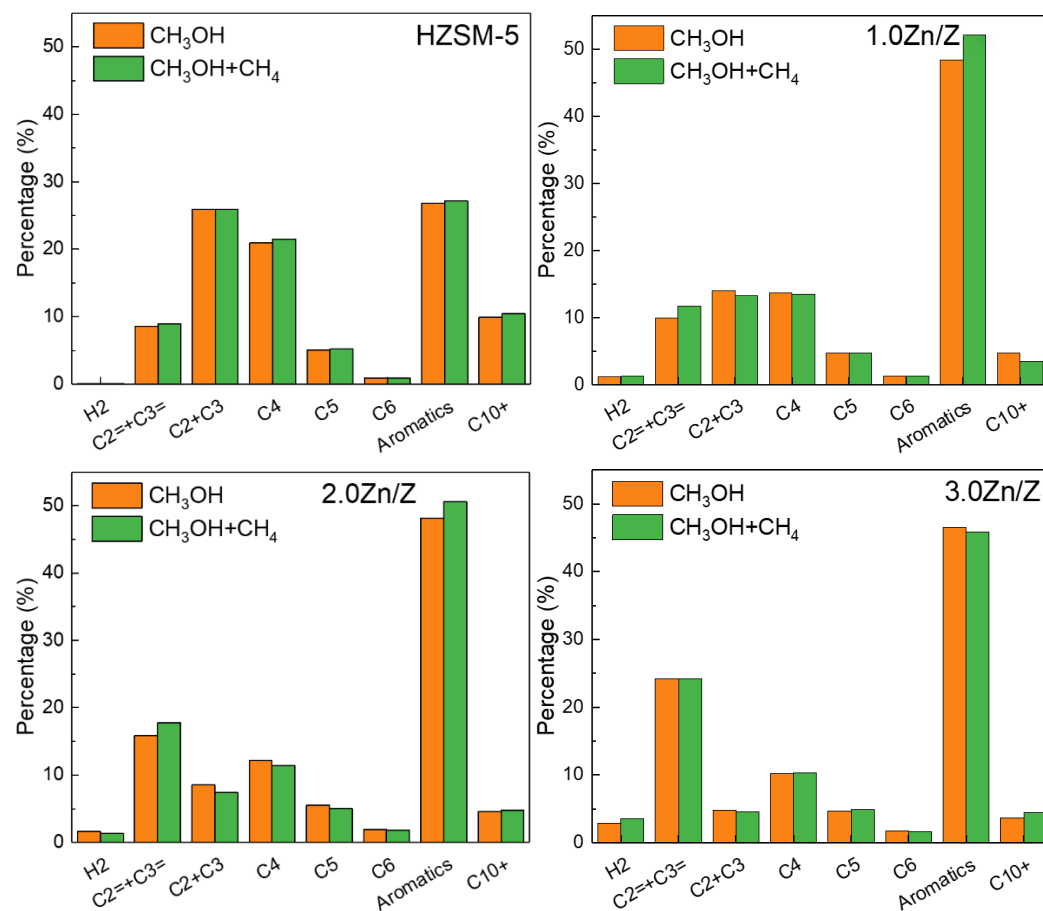

**Figure S4.** Product distribution of MTA and co-reactions on HZSM-5, 1.0Zn/Z, 2.0Zn/Z and 3.0Zn/Z.

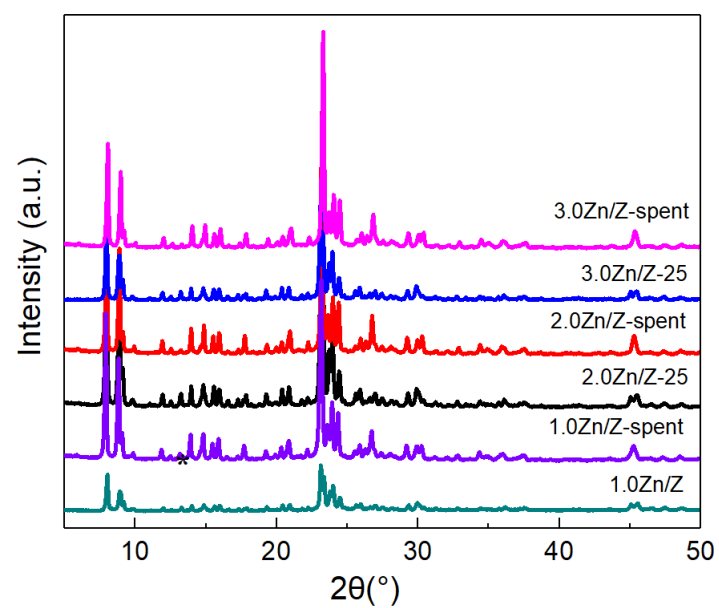

**Figure S5.** XRD patterns in range of 5-50° of HSZM-5, 1.0Zn/Z, 2.0Zn/Z and 3.0Zn/Z and MFI simulated one.

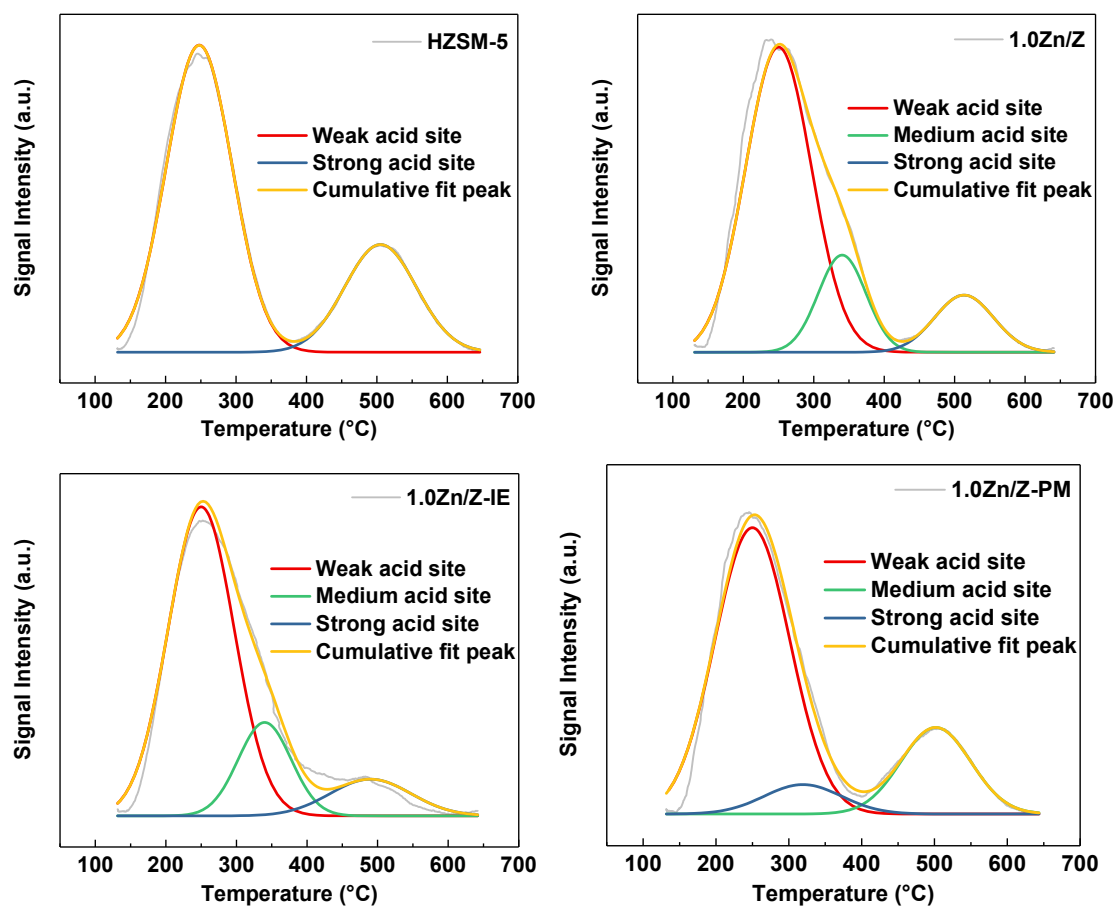

**Figure S6.** NH<sub>3</sub>-TPD curves of HZSM-5, 1.0Zn/Z, 1.0Zn/Z-IE and 1.0Zn/Z-PM.

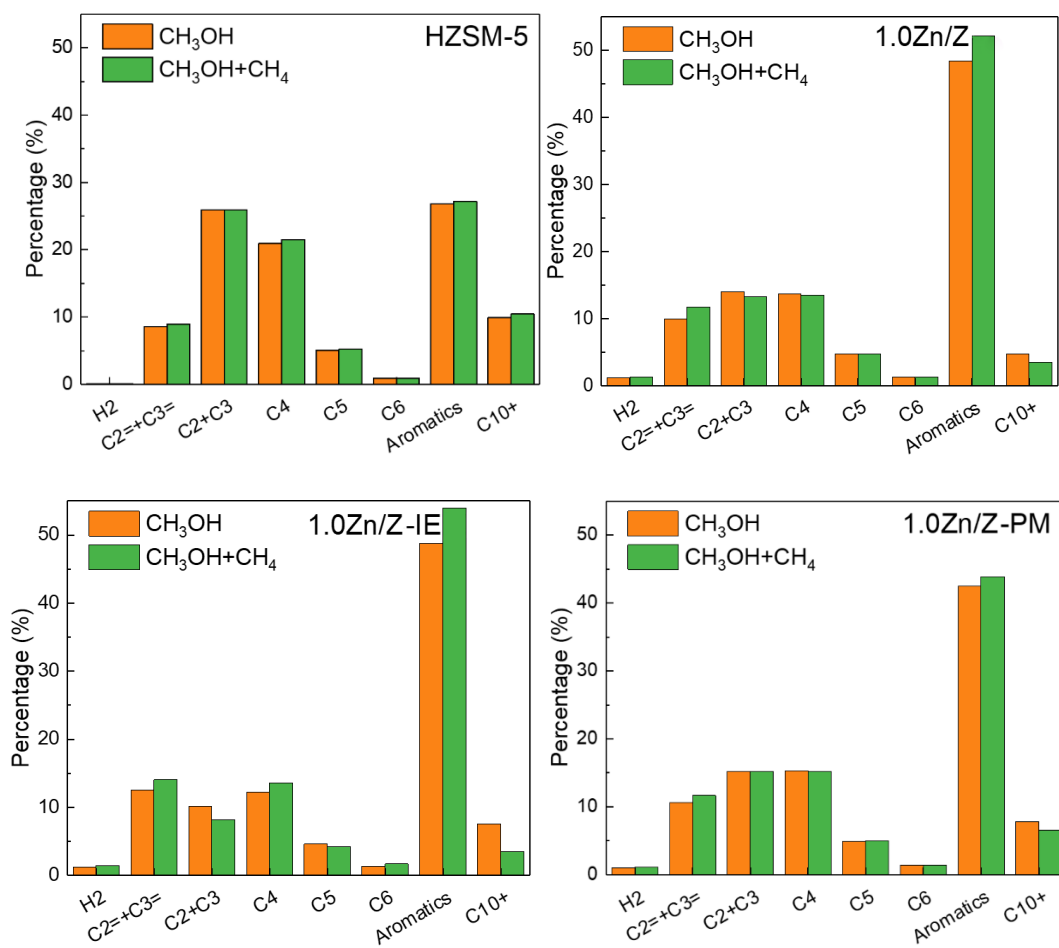

**Figure S7.** Product distribution of MTA and co-reactions on HZSM-5, 1.0Zn/Z, 1.0Zn/Z-IE and 1.0Zn/Z-PM.

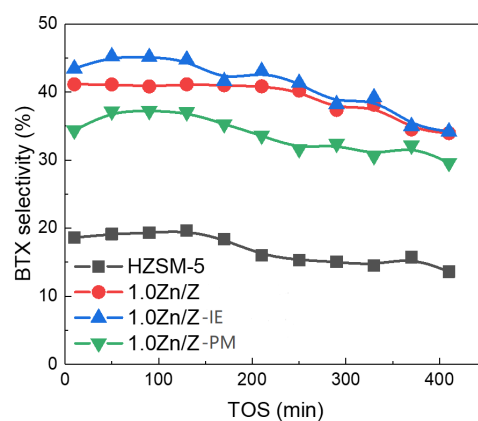

**Figure S8.** Aromatics selectivity of co-reaction over HZSM-5, 1.0Zn/Z, 1.0Zn/Z-IE and 1.0Zn/Z-PM by different Zn-loading strategies with time on stream.

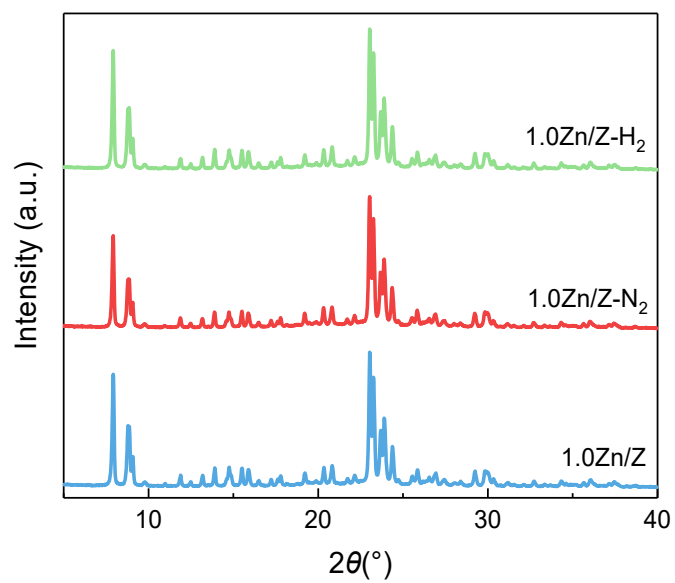

**Figure S9.** XRD patterns in range of 5-50° of HSZM-5, 1.0Zn/Z, 1.0Zn/Z-H<sub>2</sub> and 1.0Zn/Z-N<sub>2</sub> and MFI simulated one.

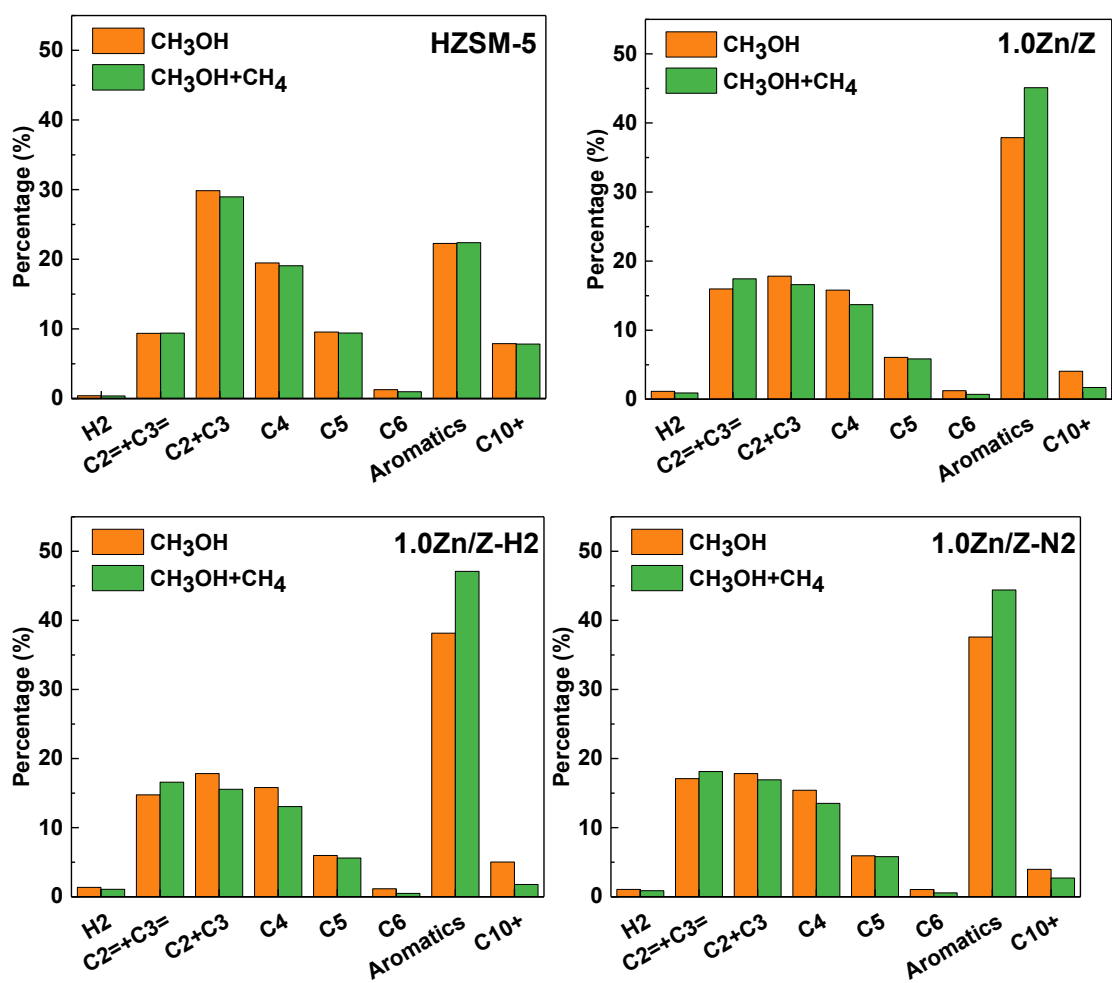

**Figure S10.** Product distribution of MTA and co-reactions on HZSM-5, 1.0Zn/Z, 1.0Zn/Z-H<sub>2</sub> and 1.0Zn/Z-N<sub>2</sub>.

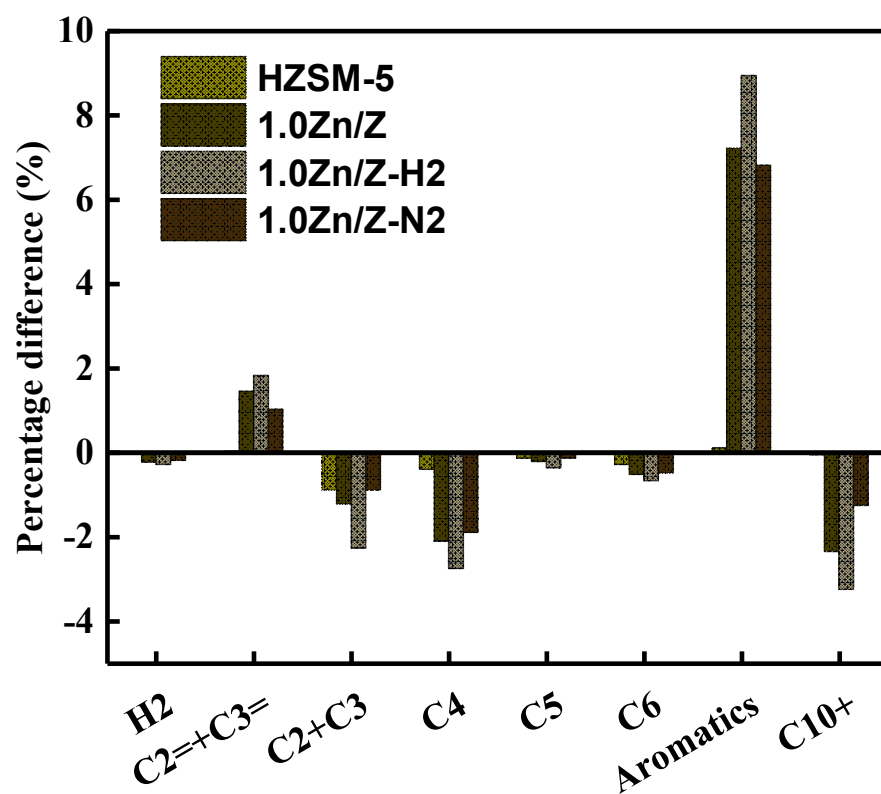

**Figure S11.** Difference of product distribution between co-reaction and MTA reaction over HZSM-5, 1.0Zn/Z, 1.0Zn/Z-H<sub>2</sub> and 1.0Zn/Z-N<sub>2</sub>.
